# Supplementary material
Source: Elsevier journal article supplement (https://www.sciencedirect.com/science/article/pii/S1695403320304951)
Supplement: mmc1 [file S1695403320304951:mmc1.pdf]

**Tabla S1.** COnsolidated criteria for REporting Qualitative research (COREQ) checklist.

| No                                             | Item                                     | Guide questions/description                                                                                                                                     | Page |
|------------------------------------------------|------------------------------------------|-----------------------------------------------------------------------------------------------------------------------------------------------------------------|------|
| <b>Domain 1: Research team and reflexivity</b> |                                          |                                                                                                                                                                 |      |
| <i>Personal Characteristics</i>                |                                          |                                                                                                                                                                 |      |
| 1.                                             | Interviewer/facilitator                  | Which author/s conducted the interview or focus group?                                                                                                          | 5    |
| 2.                                             | Credentials                              | What were the researcher's credentials? <i>E.g. PhD, MD</i>                                                                                                     | 5    |
| 3.                                             | Occupation                               | What was their occupation at the time of the study?                                                                                                             | 5    |
| 4.                                             | Gender                                   | Was the researcher male or female?                                                                                                                              | 1,5  |
| 5.                                             | Experience and training                  | What experience or training did the researcher have?                                                                                                            | 5    |
| <i>Relationship with participants</i>          |                                          |                                                                                                                                                                 |      |
| 6.                                             | Relationship established                 | Was a relationship established prior to study commencement?                                                                                                     | 5    |
| 7.                                             | Participant knowledge of the interviewer | What did the participants know about the researcher? <i>e.g. personal goals, reasons for doing the research</i>                                                 | 5    |
| 8.                                             | Interviewer characteristics              | What characteristics were reported about the interviewer/facilitator? <i>e.g. Bias, assumptions, reasons and interests in the research topic</i>                | 4,5  |
| <b>Domain 2: study design</b>                  |                                          |                                                                                                                                                                 |      |
| <i>Theoretical framework</i>                   |                                          |                                                                                                                                                                 |      |
| 9.                                             | Methodological orientation and Theory    | What methodological orientation was stated to underpin the study? <i>e.g. grounded theory, discourse analysis, ethnography, phenomenology, content analysis</i> | 4,5  |
| <i>Participant selection</i>                   |                                          |                                                                                                                                                                 |      |
| 10.                                            | Sampling                                 | How were participants selected? <i>e.g. purposive, convenience, consecutive, snowball</i>                                                                       | 4,5  |

| No                                     | Item                         | Guide questions/description                                                              | Page |
|----------------------------------------|------------------------------|------------------------------------------------------------------------------------------|------|
| 11.                                    | Method of approach           | How were participants approached? e.g. <i>face-to-face, telephone, mail, email</i>       | 4,5  |
| 12.                                    | Sample size                  | How many participants were in the study?                                                 | 4,5  |
| 13.                                    | Non-participation            | How many people refused to participate or dropped out? Reasons?                          | 4,5  |
| <i>Setting</i>                         |                              |                                                                                          |      |
| 14.                                    | Setting of data collection   | Where was the data collected? e.g. <i>home, clinic, workplace</i>                        | 4,5  |
| 15.                                    | Presence of non-participants | Was anyone else present besides the participants and researchers?                        | 4,5  |
| 16.                                    | Description of sample        | What are the important characteristics of the sample? e.g. <i>demographic data, date</i> | 4,5  |
| <i>Data collection</i>                 |                              |                                                                                          |      |
| 17.                                    | Interview guide              | Were questions, prompts, guides provided by the authors? Was it pilot tested?            | n/a  |
| 18.                                    | Repeat interviews            | Were repeat interviews carried out? If yes, how many?                                    | n/a  |
| 19.                                    | Audio/visual recording       | Did the research use audio or visual recording to collect the data?                      | n/a  |
| 20.                                    | Field notes                  | Were field notes made during and/or after the interview or focus group?                  | 4,5  |
| 21.                                    | Duration                     | What was the duration of the interviews or focus group?                                  | n/a  |
| 22.                                    | Data saturation              | Was data saturation discussed?                                                           | 4,5  |
| 23.                                    | Transcripts returned         | Were transcripts returned to participants for comment and/or correction?                 | n/a  |
| <b>Domain 3: analysis and findings</b> |                              |                                                                                          |      |
| <i>Data analysis</i>                   |                              |                                                                                          |      |
| 24.                                    | Number of data               | How many data coders coded the data?                                                     | 4-6  |

| No  | Item                           | Guide questions/description                                                                                                              | Page  |
|-----|--------------------------------|------------------------------------------------------------------------------------------------------------------------------------------|-------|
|     | coders                         |                                                                                                                                          |       |
| 25. | Description of the coding tree | Did authors provide a description of the coding tree?                                                                                    | 4-66  |
| 26. | Derivation of themes           | Were themes identified in advance or derived from the data?                                                                              | 6-10  |
| 27. | Software                       | What software, if applicable, was used to manage the data?                                                                               | 6     |
| 28. | Participant checking           | Did participants provide feedback on the findings?                                                                                       | n/a   |
|     | Reporting                      |                                                                                                                                          |       |
| 29. | Quotations presented           | Were participant quotations presented to illustrate the themes / findings? Was each quotation identified? e.g. <i>participant number</i> | 6-10  |
| 30. | Data and findings consistent   | Was there consistency between the data presented and the findings?                                                                       | 10-14 |
| 31. | Clarity of major themes        | Were major themes clearly presented in the findings?                                                                                     | 10-14 |
| 32. | Clarity of minor themes        | Is there a description of diverse cases or discussion of minor themes?                                                                   | 10-14 |
